# Supplementary material for: 6-SFT, a Protein from Leymus mollis, Positively Regulates Salinity Tolerance and Enhances Fructan Levels in Arabidopsis thaliana
Source: MDPI journal article supplement (doi:10.3390/ijms20112691), 2019-05-31

**Supplementary 5.** Characterizing the transgenic plants by PCR with the primers 6-SFTF and 6-SFTR (Table 1). M:DL2000 maker; TP1,TP2 and TP3:transgenic lines; +:positive control;—:negative control.

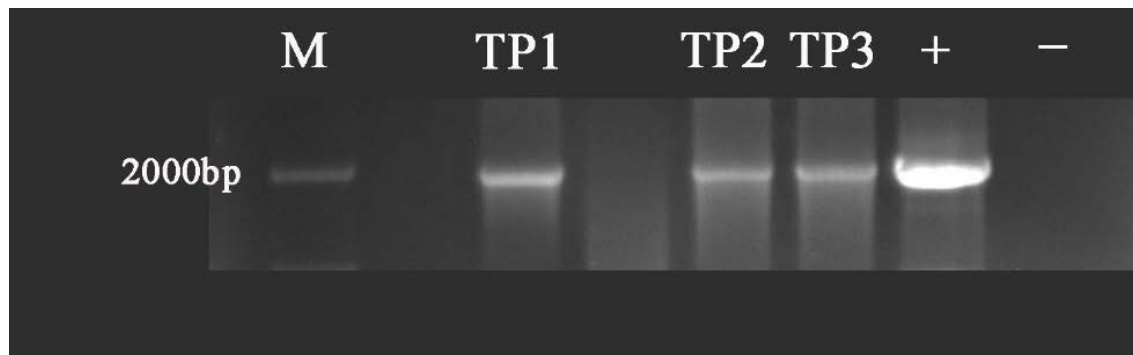

Supplement: s1 [file s1]
