# Supplementary material for: 6-SFT, a Protein from Leymus mollis, Positively Regulates Salinity Tolerance and Enhances Fructan Levels in Arabidopsis thaliana
Source: MDPI journal article supplement (doi:10.3390/ijms20112691), 2019-05-31
Supplement: s1 [file s1]

|                            |                                                                 |
|----------------------------|-----------------------------------------------------------------|
| Leymus_mollis              | ATGGGGTCACACGGCAAGCCACCCTACCGTACGCGTACAAGCCGTGCTGTCCGGCGCTG     |
| Leymus_ramosus_Lam._Tzvel. | ATGGGGTCACACGGCAAGCCACCCTACCGTACGCGTACAAGCCGTGCGCGTCCGGCGGCC    |
| Psathyrostachys_huashanica | ATGGGGTCACACGGCAAGCCACCCTACCGTACGCGTACAAGCCGTGCCGTCCGGCGC-      |
|                            | *****                                                           |
| Leymus_mollis              | GCCGCGGACGCGCATGGTGAGCGGACCGACTGCACGAGGTGGCGCGTGTGCGCCACCGTG    |
| Leymus_ramosus_Lam._Tzvel. | GCCGCGCGCACGATGGTGAGCGGACCGGCTGTACGAGGTGGCGCGTGTGTGCCACCGTG     |
| Psathyrostachys_huashanica | -----CGATGGTGAGCGGACCGGCTGTACGAGGTGGCGCGTGTGTGCGCCACCGTG        |
|                            | *****                                                           |
| Leymus_mollis              | CTGACGGCCTTGCCCATGGTGGTGGTGGTGGTGGTGGCGGCCACGCTCCTGTGAGATTACAG  |
| Leymus_ramosus_Lam._Tzvel. | CTGACGGCCTCGGCCATGGTGGTGGTGGTGGTGGTGGCGGCCACGCTCCTGGCAGGAGTCAGG |
| Psathyrostachys_huashanica | CTGACGGCCTCGGCCATGGTGGTGGTGGTGGTGGTGGCGGCCACGCTCCTGGCAGGAGTCAG  |
|                            | *****                                                           |
| Leymus_mollis              | GTGGACGAGGCGGTCAACGAGGAGGCGCGGGCGGGTTCCCATGGAGCAACGAGATGCTG     |
| Leymus_ramosus_Lam._Tzvel. | TTCGACGAGGCGGGCACGAGGAGGCGCGGGTGGGTTCCCGTGGAGCAACGAGATGCTG      |
| Psathyrostachys_huashanica | TTCGACGAGGCGGGCACGAGGAGGCGCGGGCGGGTTCCCGTGGAGCAACGAGATGCTG      |
|                            | * *****                                                         |
| Leymus_mollis              | CAGTGGCAGCGCAGTGGTTACCATTACCAGCCGGCGAAGAATACTACATGAGCGATCCCAAC  |
| Leymus_ramosus_Lam._Tzvel. | CAGTGGCAGCGCAGTGGTTACCATTTCAGCCGGCGAAGAATACTACATGAGCGATCCCAAC   |
| Psathyrostachys_huashanica | CAGTGGCAGCGCAGTGGTTACCATTTCAGCCGGCGAAGAATACTACATGAGCGATCCCAAC   |
|                            | *****                                                           |
| Leymus_mollis              | GGTCTGTTTACTACCGTGGATGGTACCACATGTTCTACCAGTACAACCCGGTGGGCACC     |
| Leymus_ramosus_Lam._Tzvel. | GGTCTGATGTACTACCGTGGATGGTACCACATGTTCTTCCAATACAACCCGGTGGGCACC    |
| Psathyrostachys_huashanica | GGTCTGATGTACTACCGTGGATGGTACCACATGTTCTTCCAATACAACCCGGTGGGCACC    |
|                            | ***** * *****                                                   |
| Leymus_mollis              | GATTGGGCTGACGCGATGGAGTGGGGCCACGCCGTGACCCGAACCTTGTCCAGTGGCGC     |
| Leymus_ramosus_Lam._Tzvel. | GATTGGGATGACGCGATGGAGTGGGGCCACGCCGTGTCGCGAACCTTGTCCAATGGCGC     |
| Psathyrostachys_huashanica | GATTGGGATGACGCGATGGAGTGGGGCCACGCCGTGTCGCGAACCTTGTCCAATGGCGC     |
|                            | ***** *****                                                     |
| Leymus_mollis              | ACCCTCCCTATTGCCATGAAGACCGACCACTGGTACGACATCCTCGGCGTCTGTGCGGC     |
| Leymus_ramosus_Lam._Tzvel. | ACCCTCCCTATTGCCATGGTGGCCGACCACTGGTACGACATCCTGGGAGTCTGTGCGGC     |
| Psathyrostachys_huashanica | ACCCTCCCTATTGCCATGGTGGCCGACCACTGGTACGACATCCTGGGAGTCTGTGCGGC     |
|                            | ***** * *****                                                   |
| Leymus_mollis              | TCTGTACGGTGCTACCAATGGCACAGTCATCATGCTCTACAGGGGGCCACTAAACAAC      |
| Leymus_ramosus_Lam._Tzvel. | TCTATGACGGTGCTACCAATGGCACAGTCATCATGCTGTACAGGGGGCCACCAATGCC      |
| Psathyrostachys_huashanica | TCTATGACGGTGCTACCAATGGCACAGTCATCATGCTGTACAGGGGGCCACCAACGCC      |
|                            | ** * *****                                                      |
| Leymus_mollis              | TGGTACGTTGAGGCTACGTGCCTCGCTCTCCCCGCCGACCCCAACGACCCCTCCTCCGC     |
| Leymus_ramosus_Lam._Tzvel. | TCCGCTGTTGAGGTCCAGTGCATCGCCACCCCGCCGACCCCAATGACCCCTCCTCCGC      |
| Psathyrostachys_huashanica | TCCGCGGTTGAGGTCCAGTGCATCGCCACCCCGCCGACCCCGCCGACCCCTCCTCCGC      |
|                            | * *****                                                         |
| Leymus_mollis              | CGCTGGACCAAGCACCTGCGCAATCCCATCATCTGGTGC CGCGCGGGGATCGGCACCAAG   |
| Leymus_ramosus_Lam._Tzvel. | CGATGGACCAAGCACCCGCGCAATCCCGTCATCTGGTCACCGCGGGGTCGGCACCAAG      |
| Psathyrostachys_huashanica | CGCTGGACCAAGCACCCGCGCAATCCTATCATCTGGTGC CGCGCGGGGTCGGCACCAAG    |
|                            | ** *****                                                        |
| Leymus_mollis              | GATTTCCGCGACCCGATGACCGCTTGGTATGATGATTCTGATCACACATGGCGCACCCCTC   |
| Leymus_ramosus_Lam._Tzvel. | GATTTGAGAGACCGATGACCGCTTGGTATGATGAATCTGACCACACATGGCGCACCCCTC    |
| Psathyrostachys_huashanica | GATTTCCGAGACCCGATGACCGCTTGGTATGATGAATCTGACCACACATGGCGCACCCCTC   |
|                            | ***** * *****                                                   |
| Leymus_mollis              | TTCGGGTCCAAGGACGACCACAACGGCCACCACGATGGCATCGCCATCATGTACAAGACC    |
| Leymus_ramosus_Lam._Tzvel. | CTCGGGTCCAAGGATGACCACCACGGCCACCACGATGGCATCGCCATCATGTACAAGACC    |
| Psathyrostachys_huashanica | CTCGGGTCCAAGGACGACCACCACGGCCACCACGATGGCATCGCCATCATGTACAAGACC    |
|                            | *****                                                           |
| Leymus_mollis              | AAGGACTTCTTAATATGAGCTCATCCCGGGCATCTTGCATCGAGTCGAGAACACCGGT      |
| Leymus_ramosus_Lam._Tzvel. | AAGGACTTCTTAATATGAGCTCATCCCGGGCATCTTGCATCGAGTCGAGAACACCGGC      |
| Psathyrostachys_huashanica | AAGGACTTCTTAATATGAGCTCATCCCGGGCATCTTGCATCGAGTCGAGAACACCGGC      |
|                            | *****                                                           |

|                              |                                                                 |
|------------------------------|-----------------------------------------------------------------|
| Leymus_mollis                | GAGTGGGAGTGCATCGACTTCTACCCTGTGCGGCAGCGGCGGCAGCGAGAACTCATCGGAG   |
| Leymus_racemosus_Lam._Tzvel. | GAGTGGGAGTGCATCGACTTCTACCCTGTGCGCCGCGAGCGGCAACGACAACACTCATCGGAG |
| Psathyrostachys_huashanica   | GAGTGGGAGTGCATCGACTTCTACCCTGTGCGCCGCGAGTGGTAGCGACAACACTCATCGGAG |
|                              | ***** * * * * *                                                 |
| Leymus_mollis                | GTGTTGCACGTGTTGAAGGCGAGCATGGACGACGAACGACGACTACTACTCGCTAGGC      |
| Leymus_racemosus_Lam._Tzvel. | ATGTTGCACGTGTTGAAGACGAGCATGGACGACGAACGGCACGACTACTACTCGCTAGGC    |
| Psathyrostachys_huashanica   | ATGTTGCACGTGTTGAAGGCGAGCATGGACGACGAACGGCACGACTACTACTCGCTAGGC    |
|                              | *****                                                           |
| Leymus_mollis                | AGGTACGACGCGGGGGCAAACAAGTGGACGCCGATTGACCCGGAGGCAGACTTGGGGGATC   |
| Leymus_racemosus_Lam._Tzvel. | AGGTACGACTCGGCGGCAAACACGTGGACGCCGATTGACCCGGAGCTCGACTTGGGGGATC   |
| Psathyrostachys_huashanica   | AGGTACGACTCAGTGGCAAACACGTGGACGCCGTTGACCCGGAGCTCGACTTGGGGGATC    |
|                              | ***** * * * * *                                                 |
| Leymus_mollis                | GGGCTGAGATACGACTGGGGTAAGTTTATGCGTCCACCACGTTCTATGGCCCGGTGAAG     |
| Leymus_racemosus_Lam._Tzvel. | GGGCTGAGATACGACTGGGGTAAGTTTATGCGTCCACCACATTCTATGATCCGGCGAAG     |
| Psathyrostachys_huashanica   | GGGTTGAGATACGACTGGGGTAAGTTTATGCGTCCACCACGTTCTATGATCCGGCGAAG     |
|                              | *** *****                                                       |
| Leymus_mollis                | CACCGGCGCGTGTGTATGGGGTACGTCGCGCAGGTCGACTCCAAGCGGGCCGACATTGAC    |
| Leymus_racemosus_Lam._Tzvel. | AAGCGGCGCGTGTGTATGGGGTACGTCGCGCAGGTCGACTCCAAGCGGGCTGACGTCGTG    |
| Psathyrostachys_huashanica   | AAGCGGCGTGTGTGTACGGGGTACGTTGGTGAGGTCGACTCCAAGCGGGCTGACGTCGTG    |
|                              | * ***** * * * *                                                 |
| Leymus_mollis                | AAGGGATGGGCCTCAATCCAGTCAGTTCTCTAGAACGGTGGCTCTAGACGAGAAGACCCGG   |
| Leymus_racemosus_Lam._Tzvel. | AAGGGATGGGCCTCGATTTCAGTCAGTTCTTAGGACGGTGACTCTAGATGAGAAGACCCGG   |
| Psathyrostachys_huashanica   | AAGGGATGGGCCTCGATTTCAGTCAGTTCTTAGGACGGTGGCTCTGGACGAGAAGACCCGG   |
|                              | ***** * * * * *                                                 |
| Leymus_mollis                | ACGAACCTCCTCCTCTGGCCAGTGAGGAGATCGAGACCCTCCGCCTCAACGCCACCGAA     |
| Leymus_racemosus_Lam._Tzvel. | ACGAACCTCCTCCTATGGCCTGTGGAGGAGATTGAGACCCTCCGCCTCAATGCCACCGAA    |
| Psathyrostachys_huashanica   | ACGAACCTCCTCCTATGGCCTGTGGAGGAGATTGAGACCCTCCGCCTCAATGCCACCGAA    |
|                              | ***** * * * * *                                                 |
| Leymus_mollis                | CTTAGCGACATCACCATTGACACCGGCTCTGTCTTCGCTGTCCCCCTCCGCGAAGCCGCT    |
| Leymus_racemosus_Lam._Tzvel. | CTTAGCGACGTACCATTAACACTGGCTCTGTCTTCATGTCCCCCTCCGTCAAGGCACT      |
| Psathyrostachys_huashanica   | CTTAGCGACGTACCATTAACACTGGTTCCGTCTTCATGTCCCCCTCCGCCAAGGCACT      |
|                              | ***** * * * * *                                                 |
| Leymus_mollis                | CAGCTCGACATTGAGGCCTATTTCGCGCTTGATGCTTCGGCCGTCGACGCCCTCAATGAG    |
| Leymus_racemosus_Lam._Tzvel. | CAGCTCGACATCGAGGCCTCTTTCCGCGCTTGATGCTTCTGCCGTGCTGCCCTCAATGAG    |
| Psathyrostachys_huashanica   | CAGCTCGACATCGAGGCCTCTTTCCGCGCTTGATGCTTCTGCCGTGCTGCCCTCAATGAG    |
|                              | *****                                                           |
| Leymus_mollis                | GCTGATGTGGGCTACAACCTGCAGTAGCAGCGGCGGTGCTGCTACCCGCGGCGCACTAGGC   |
| Leymus_racemosus_Lam._Tzvel. | GCTGATGTGGGCTATAACTGTAGTAGCAGCGGCGGTGCTGCTACCCGCGGTGCGCTAGGC    |
| Psathyrostachys_huashanica   | GCTGATGTGGGCTACAACCTGTAGTAGCAGCAGCGGTGCTGCTACCCGCGGCGCGCTAGGC   |
|                              | ***** * * * * *                                                 |
| Leymus_mollis                | CTTTCGCGCTCCTCGTCTCGCTGCTGCGACCGCTGCTGGCGAGCAAACGGCAGTGTAC      |
| Leymus_racemosus_Lam._Tzvel. | CCCTTCGCGCTCCTCGTCTCGCTGCTGGTAACCGCCTTGGCGAGCAAACGGCGGTGTAC     |
| Psathyrostachys_huashanica   | CCCTTCGCGCTCCTCGTCTCGCTGCTGGTAACCGCCTTGGCGAGCAAACGGCGGTGTAC     |
|                              | * *****                                                         |
| Leymus_mollis                | TTCTACGTGTCCAAGGGCCTCGACGGAAGCCTGCGGACTAGCTTCTGCCAAGACGAGTCA    |
| Leymus_racemosus_Lam._Tzvel. | TTCTACGTGTCTAGGGGCTCGACGAGGCCTCCAGACCAGCTTCTGCCAAGACGAGTTG      |
| Psathyrostachys_huashanica   | TTCTACGTGTCTAGGGACCTCGACGAGGCCTCCAGACCAGCTTCTGCCAAGACGAGTTG     |
|                              | ***** * * * * *                                                 |
| Leymus_mollis                | CGGTCGTACGGGCCAGGGATGTGACGAAGCGGGTGATTGGGAGCACCGTACCGGTGCTC     |
| Leymus_racemosus_Lam._Tzvel. | AGATCGTCGTGGGCCAAGGATGTGACGAAGCGGGTGATTGGGAGCACCGTACCGGTGCTC    |
| Psathyrostachys_huashanica   | AGATCGTCATGGGCCAAGGATGTGACGAAGCGGGTGATTGGGAGCACCGTACCGGTGCTC    |
|                              | * *****                                                         |
| Leymus_mollis                | GAAGGTGAGGTTTTTTCTATGAGGGTGCTCGTGGACCACTCCATCGTGCAAGGCTTCGCG    |
| Leymus_racemosus_Lam._Tzvel. | GATGGTGAGGCTTTTTCAATGAGGGTACTCGTGGACCACTCCATCGTGCAAGGCTTCGCG    |
| Psathyrostachys_huashanica   | GATGGTGAGGCTTTTTCAATGAGGGTACTCGTGGACCACTCCATCGTGCAAGGCTTCGCG    |
|                              | ** *****                                                        |

```

Leymus_mollis      ATGGGCGGGAGGTGCACGATGACATCACGGGTGTACCCGACGGAGGCGATCTACCAGAAG
Leymus_racemosus_Lam._Tzvel. ATGGGCGGGAGGACCACGATGACATCACGGGTGTACCCGATGGAGGC--CTATCAGGAG
Psathyrostachys_huashanica ATGGGCGGGAGGACCACGATGACGTACGGGTGTACCCGATGGAGGC--CTATCAGGAG
                        *****
Leymus_mollis      GCAGGAGTATATTGTTCAACAATGCCACAAGCGCCCGCGTGACGGCGGAAAGGCTTGTC
Leymus_racemosus_Lam._Tzvel. GCAGGAGTGTACTTGTTCAACAATGCCACCGGTGCCGGCGTGACAGCGGAAAGGCTTGTC
Psathyrostachys_huashanica GCAGGAGTGTACTTGTTCAACAATGCCACTGGTGCCGGCGCGACAGCGGAAAGGCTTGTC
                        *****
Leymus_mollis      GTGCACGAGATGGACTCATCACACAACCAGCTCTCCAATGAGGACGATGACTTGTTCCTT
Leymus_racemosus_Lam._Tzvel. GTGCATGAGATGGACTCAGCACACAACCAACTCTCCAATGAAGACGATGGCTTGTATCTT
Psathyrostachys_huashanica GTGCACGAGATGGACTCAGCACACAACCAACTCTCCAATGAGGACGATGGCTTGTATCTT
                        *****
Leymus_mollis      CAATGA
Leymus_racemosus_Lam._Tzvel. CAATGA
Psathyrostachys_huashanica CAATGA
                        *****

```

Sequence alignment based on *6-SFT* cDNA from *Psathyrostachys huashanica* (NsNs), *Leymus racemosus* (Lam.) Tzvel. (NsNsXmXm), and *Leymus mollis* (NsNsXmXm).
