# Supplementary material for: 6-SFT, a Protein from Leymus mollis, Positively Regulates Salinity Tolerance and Enhances Fructan Levels in Arabidopsis thaliana
Source: MDPI journal article supplement (doi:10.3390/ijms20112691), 2019-05-31
Supplement: s1 [file s1]

## Supplementary 1:CDNA and Amino acid sequences of Lm-6-SFT

```
1      ATGGGGTCACACGGCAAGCCACCGCTACCGTACGCGTACAAGCCGCTGCTGTCCGGCGCT
1      M  G  S  H  G  K  P  P  L  P  Y  A  Y  K  P  L  L  S  G  A

          70          80          90          100          110          120
61     GCCGCGGACGCCGATGGTGAGCGGACCGACTGCACGAGGTGGCGCGTGTGCCACCGTG
21     A  A  D  A  D  G  E  R  T  D  C  T  R  W  R  V  C  A  T  V

          130          140          150          160          170          180
121    CTGACGGCCTTGGCCATGGTGGTGGTGGTGGTTCGCCGCCACGCTCCTGTACAGGATTACAG
41     L  T  A  L  A  M  V  V  V  V  V  A  A  T  L  L  S  G  F  R

          190          200          210          220          230          240
181    GTGGACCAGGCGGTCAACGAGGAGGCGGCGGGCGGGTTCCCATGGAGCAACGAGATGCTG
61     V  D  Q  A  V  N  E  E  A  A  G  G  F  P  W  S  N  E  M  L

          250          260          270          280          290          300
241    CAGTGGCAGCGCAGTGGTTACCATTACCAGCCGGCGAAGAAGTACATGAGCGATCCCAAC
81     Q  W  Q  R  S  G  Y  H  Y  Q  P  A  K  N  Y  M  S  D  P  N

          310          320          330          340          350          360
301    GGTCTGTTCTACTACCGTGGATGGTACCACATGTTCTACCAGTACAACCCGGTGGGCACC
101    G  L  F  Y  Y  R  G  W  Y  H  M  F  Y  Q  Y  N  P  V  G  T

          370          380          390          400          410          420
361    GATTGGGCTGACGGCATGGAGTGGGGCCACGCCGTGACCCGGAACCTTGTCCAGTGGCGC
121    D  W  A  D  G  M  E  W  G  H  A  V  T  R  N  L  V  Q  W  R

          430          440          450          460          470          480
421    ACCCTCCCTATTGCCATGAAGACCGACCAAGTGGTACGACATCCTCGGCGTCTTGTCGGGC
141    T  L  P  I  A  M  K  T  D  Q  W  Y  D  I  L  G  V  L  S  G

          490          500          510          520          530          540
481    TCTGTACGGTGCTACCCAATGGCACAGTCATCATGCTCTACACGGGGGCCACTAACAAC
161    S  V  T  V  L  P  N  G  T  V  I  M  L  Y  T  G  A  T  N  N

          550          560          570          580          590          600
541    TGGTACGTTGAGGCTACGTGCCTCGCTCTCCCCGCCGACCCCAACGACCCCTCTCTCCGC
181    W  Y  V  E  A  T  C  L  A  L  P  A  D  P  N  D  P  L  L  R

          610          620          630          640          650          660
601    CGCTGGACCAAGCACCCCTGCCAATCCCATCATCTGGTTCGCCGCCGGGGATCGGCACCAAG
201    R  W  T  K  H  P  A  N  P  I  I  W  S  P  P  G  I  G  T  K

          670          680          690          700          710          720
661    GATTTCCGCGACCCGATGACCGCTTGGTATGATGATTCTGATCACACATGGCGCACCCCTC
221    D  F  R  D  P  M  T  A  W  Y  D  D  S  D  H  T  W  R  T  L

          730          740          750          760          770          780
721    TTCGGGTCCAAGGACGACCACAACGGCCACCACGATGGCATCGCCATCATGTACAAGACC
241    F  G  S  K  D  D  H  N  G  H  H  D  G  I  A  I  M  Y  K  T

          790          800          810          820          830          840
781    AAGGACTTCCTTAACTATGAGCTCATCCCGGCATCTTGCATCGAGTCGAGAACACCGGT
261    K  D  F  L  N  Y  E  L  I  P  G  I  L  H  R  V  E  N  T  G

          850          860          870          880          890          900
841    GAGTGGGAGTGCATCGACTTCTACCCTGTCGGCAGCGCGGCAGCGAGAACTCATCGGAG
281    E  W  E  C  I  D  F  Y  P  V  G  S  G  G  S  E  N  S  S  E

          910          920          930          940          950          960
901    GTGTTGCACGTGTTGAAGGCGAGCATGGACGACGAACGACACGACTACTACTCGCTAGGG
301    V  L  H  V  L  K  A  S  M  D  D  E  R  H  D  Y  Y  S  L  G

          970          980          990          1000          1010          1020
```

```

961      AGGTACGACGCGGGGGCAAACAAGTGGACGCCGATTGACCCGGAGGCAGACTTGGGGATC
321      R Y D A G A N K W T P I D P E A D L G I

          1030      1040      1050      1060      1070      1080
1021     GGGCTGAGATACGACTGGGGTAAGTTTTATGCGTCCACCACGTTCTATGGCCCCGTGAAG
341      G L R Y D W G K F Y A S T T F Y G P V K

          1090      1100      1110      1120      1130      1140
1081     CACCGGCGCGTGTTGATGGGGTACGTCGGCGAGGTCGACTCCAAGCGGGCCGACATTGAC
361      H R R V L M G Y V G E V D S K R A D I D

          1150      1160      1170      1180      1190      1200
1141     AAGGGATGGGCCTCAATCCAGTCAGTTCCTAGAACGGTGGCTCTAGACGAGAAGACCCGG
381      K G W A S I Q S V P R T V A L D E K T R

          1210      1220      1230      1240      1250      1260
1201     ACGAACCTCCTCCTCTGGCCAGTGGAGGAGATCGAGACCCTCCGCCTCAACGCCACCGAA
401      T N L L L W P V E E I E T L R L N A T E

          1270      1280      1290      1300      1310      1320
1261     CTTAGCGACATCACCATTGACACCGGCTCTGTCTTCGCTGTCCCCCTCCGCGAAGCCGCT
421      L S D I T I D T G S V F A V P L R E A A

          1330      1340      1350      1360      1370      1380
1321     CAGCTCGACATTGAGGCCTATTTCCGCCTTGATGCTTCGGCCGTCGCGAGCCCTCAATGAG
441      Q L D I E A Y F R L D A S A V A A L N E

          1390      1400      1410      1420      1430      1440
1381     GCTGATGTGGGCTACAACCTGCAGTAGCAGCGGCGGTGCTGCTACCCGCGGCGCACTAGGC
461      A D V G Y N C S S S G G A A T R G A L G

          1450      1460      1470      1480      1490      1500
1441     CTCTTCGGCCTCCTCGTCCTCGCTGCTGGCGACCGTCGTCGGCGAGCAAACGGCAGTGTAC
481      L F G L L V L A A G D R R G E Q T A V Y

          1510      1520      1530      1540      1550      1560
1501     TTCTACGTGTCCAAGGGCCTCGACGGAAGCCTGCGGACTAGCTTCTGCCAAGACGAGTCA
501      F Y V S K G L D G S L R T S F C Q D E S

          1570      1580      1590      1600      1610      1620
1561     CGGTCGTCACGGGCCAGGGATGTGACGAAGCGGGTGATTGGGAGCACCGTACCGGTGCTC
521      R S S R A R D V T K R V I G S T V P V L

          1630      1640      1650      1660      1670      1680
1621     GAAGGTGAGGTTTTTTTCTATGAGGGTGCTCGTGGAACCACTCCATCGTGCAAGGCTTCGCG
541      E G E V F S M R V L V D H S I V Q G F A

          1690      1700      1710      1720      1730      1740
1681     ATGGGCGGGAGGTGCACGATGACATCACGGGTGTACCCGACGGAGGCGATCTACCAGAAG
561      M G G R C T M T S R V Y P T E A I Y Q K

          1750      1760      1770      1780      1790      1800
1741     GCAGGAGTATATTTGTTCAACAATGCCACAAGCGCCCGCTGACGGCGGAAAGGCTTGTC
581      A G V Y L F N N A T S A R V T A E R L V

          1810      1820      1830      1840      1850      1860
1801     GTGCACGAGATGGACTCATCACACAACCAGCTCTCCAATGAGGACGATGACTTGTTTCTT
601      V H E M D S S H N Q L S N E D D D L F L

1861     CAATGA
621      Q  *

```
