# Supplementary material for: 6-SFT, a Protein from Leymus mollis, Positively Regulates Salinity Tolerance and Enhances Fructan Levels in Arabidopsis thaliana
Source: MDPI journal article supplement (doi:10.3390/ijms20112691), 2019-05-31
Supplement: s1 [file s1]

**Supplementary 4. the sequence and cis-elements of the *Lm-6-SFT* promoter.**

| cis-elements            | position      | sequences  |
|-------------------------|---------------|------------|
| abiotic stress reponse  |               |            |
| ABRE                    | 1297          | CACGTG     |
| MBS                     | 215,1031,1227 | CAACTG     |
| MYB                     | 249,1550      | CAACCA     |
| Myb-binding site        | 249           | CAACAG     |
| MYB recognition site    | 874,1419      | CCGTTG     |
| light regulate elements |               |            |
| G-box                   | 1297          | CACGTG     |
| GATA-motif              | 80,710        | AAGGATAAGG |
| GT1-motif               | 1185          | GGTTAA     |
| Sp1                     | 1502          | GGGCGG     |
| TCT-motif               | 1494          | TCTTAC     |
| SA reponsive element    |               |            |
| TCA-element             | 564           | CCATCTTTTT |

**Sequence of the promoter of *Lm-6-SFT*:**

```

1      CAACTCACAA  ATTAGCATGG  TAGATGTGAC  CATTAGCTAC  AACATGGTAA  TTTACGCCTA
61     AATCAACCGT  CAATGAGATC  CTTATCGTTA  AACATCATGT  AATCAGTCTG  TCCTCTCCGA
121    TCTTTAGAGG  CATTGTAGAC  ATTTACTCTC  ATGGCCACAG  TTCACATCGC  TAGTTACCAA
181    ATGGCTTTAC  AACTTTCTCA  CAACACACAT  CACACAACGT  TCAGCTAGTC  AGGCACATTC
241    TTAGCCGTCT  GTTGATGAAG  GGTAGTTTGG  GCTACACGGG  GATAGTGTG  GACATACGTT
301    TTGACAAACA  TGACATGCCA  AGACACCACA  CATGACTGTG  TTGGCTTCAA  AGCTTTCTCG
361    TAGCGCATAA  CCCATAACTA  TTTTGTGTCAG  CTACTTTCCC  ACAGCTGTTT  TCTGGTAAAT
421    CACAGCCGAA  CCTTAGCCGT  CCGTTCACGA  TTGGTACTTT  TGGCATTGAT  TGTGTGCATG
481    TTCATGTGCA  GAATTTGTGT  GTGATCATT  CTTGCATCAA  CTTTGTGACA  AATTTTCACT
541    ATATGTTAGG  TATTTGTTTT  GTGAAATAGA  TGGAGAAGGC  TACACCTCTG  AGGTAAAACA
601    TGATCCATCC  AATTTTTGTT  CCGATAATCA  ACTCGATAAT  TAGCATGGTA  TAATGTGGCA
661    ATTAGCTACA  ACATGATAAT  TTACATCTAT  CAAGCTTTAA  TGATAAAATC  CTTATCGTTA
721    AACAACATGT  AATCAGTCCC  TCTGCTCTTT  AGGGGCATTT  CAGACATTTA  CCCCAGCGGC
781    CACAC TTCAC  ACCGCTAGTT  TTCAAATGAC  TTGAAGCTT  TTTCACGGCA  CACATCACAC
841    AACTAACAGT  TATTCAAACA  CATTTTTAGC  CGTCCGTTGA  TGAAGGGTAG  TTTGGACTAC
901    ACGAGGAGGA  TAGTGTGTA  CTATATTTTT  AGCCGTAGGT  GAAACACTAA  AACCCTGGCA
961    TGACCATGTT  GGCTCTACAG  CTTTCTTGCA  GCGCACAAAC  CATAACTATT  TTTTGTGAGC
1021   TACTTTCCCA  CAACTGTTTT  CCAGTAAATT  ACAGCCGAAG  CTAACACTGT  CTTGGCCGTC
1081   CGTCGATGAA  GGGTAGCTTT  GGCTACACTG  GCGTCCACCT  GTATCGTGTT  TGGACTATGT
1141   TAGTAGCCTG  GTGTGACGCA  CTGAGAACCT  GTGAAACTC  CACAGTGACT  CTGCTCCAG
1201   TAAATTGGA  ACAAATTCTA  AGCCGTCAGT  TGATGAAGGA  AGTTTTGGCT  ACACGAGAAT
1261   AGTGTTTTTA  ACCTTAGGTG  ACTACCGGAA  GCCCCTCAG  TGACTACGTT  GGCTCTACAA
1321   CTTTCTCGCA  GCGCACAGCC  CATAACTTTT  TTCGTCGGCT  ACTTTCCAC  AGCTGTGTCT
1381   TGGTAAATCA  CAGTCGAAGC  TATCACAGTC  TTGGCCGTCC  GTTGATGAAT  GGTAGTTTGG
1441   GCCTCATGTG  ACACGCCAAA  ACCTCTGTGA  AAACCAACG  ATGACTGCTC  CCATCTTACC
1501   GCCGCCAAC  TATCTATAAA  TGGCGCTAGC  CCGCCGGCTC  CAGAATCCAC  AACCATCGAC

```
