# Supplementary material for: 6-SFT, a Protein from Leymus mollis, Positively Regulates Salinity Tolerance and Enhances Fructan Levels in Arabidopsis thaliana
Source: Int J Mol Sci. 2019 May 31;20(11):2691. doi: 10.3390/ijms20112691 (PMC6600527; doi:10.3390/ijms20112691)
Supplement: Supplementary file 1 [file ijms-20-02691-s001.zip]

Archive with 6 entries (6 files):
- supplementary 1.pdf
- supplementary 2.pdf
- supplementary 3.pdf
- supplementary 4.pdf
- supplementary 5.pdf
- supplementary 6.xlsx
