# Supplementary material for: 6-SFT, a Protein from Leymus mollis, Positively Regulates Salinity Tolerance and Enhances Fructan Levels in Arabidopsis thaliana
Source: Int J Mol Sci. 2019 May 31;20(11):2691. doi: 10.3390/ijms20112691 (PMC6600527; doi:10.3390/ijms20112691)
Supplement: Supplementary file 1 [file ijms-20-02691-s001.zip › supplementary 6.xlsx]

## Sheet: chl
			chl content
			Source	Type III Sum of Squares	df	Mean Square	F	Sig.
			Corrected Model	10.9305	7	1.5615	8.23474	0.000258187
			Intercept	198.794	1	198.794	1048.36	5.15533e-16
			treatment	3.53414	1	3.53414	18.6377	0.000531342
			plantline	3.74529	3	1.24843	6.58374	0.00416642
			treatment * plantline	3.65104	3	1.21701	6.41807	0.00463829
			Error	3.03397	16	0.189623
			Total	212.759	24
			Corrected Total	13.9644	23

## Sheet: proline
	Tests of Between-Subjects Effects
	Dependent Variable : proline content
	Source	Type III Sum of Squares	df	Mean Square	F	Sig.
	Corrected Model	1803.25	7	257.607	38.0091	8.36507e-09
	Intercept	7341.91	1	7341.91	1083.28	3.98136e-16
	treatment	1481.31	1	1481.31	218.563	9.49685e-11
	plantline	155.562	3	51.8541	7.65092	0.00215444
	treatment * plantline	166.375	3	55.4584	8.18272	0.00158035
	Error	108.44	16	6.7775
	Total	9253.59	24
	Corrected Total	1911.69	23

## Sheet: fructan
	Tests of Between-Subjects Effects
	Dependent Variable: fructan content
	Source	Type III Sum of Squares	df	Mean Square	F	Sig.
	Corrected Model	60.5773	7	8.6539	354.334	2.49322e-16
	Intercept	78.5154	1	78.5154	3214.81	7.12073e-20
	treatment	23.6303	1	23.6303	967.542	9.70238e-16
	plantline	26.3131	3	8.77103	359.13	6.97378e-15
	treatment * plantline	10.6339	3	3.54464	145.135	8.18498e-12
	Error	0.390768	16	0.024423
	Total	139.483	24
	Corrected Total	60.9681	23

## Sheet: sucrose
				Tests of Between-Subjects Effects
				Dependent Variable:sucrose content
				Source	Type III Sum of Squares	df	Mean Square	F	Sig.
				Corrected Model	6.71862	7	0.959803	50.6796	9.68771e-10
				Intercept	2515.01	1	2515.01	132798	8.71233e-33
				treatment	0.492722	3	0.164241	8.67224	0.00120012
				plantline	5.55661	1	5.55661	293.401	1.02828e-11
				treatment * plantline	0.669288	3	0.223096	11.7799	0.000252548
				Error	0.303019	16	0.0189387
				Total	2522.04	24
				Corrected Total	7.02164	23

## Sheet: sos
Tests of Between-Subjects Effects
Dependent Variable:VAR00001 SOS
Source	Type III Sum of Squares	df	Mean Square	F	Sig.
Corrected Model	0.000568597	7	8.12281e-05	16.9812	2.63788e-06
Intercept	0.00258772	1	0.00258772	540.978	9.22519e-14
treatment	0.000503128	3	0.000167709	35.0606	2.89658e-07
plantline	4.03435e-05	1	4.03435e-05	8.43404	0.0103516
treatment * plantline	2.51254e-05	3	8.37514e-06	1.75087	0.197012
Error	7.65345e-05	16	4.78341e-06
Total	0.00323285	24
Corrected Total	0.000645131	23

## Sheet: P5sc1
					Tests of Between-Subjects Effects
					Dependent Variable:p5sc1
					Source	Type III Sum of Squares	df	Mean Square	F	Sig.
					Corrected Model	3888.75	7	555.535	36.1629	1.20962e-08
					Intercept	3429.02	1	3429.02	223.214	8.11117e-11
					treatment	296.004	3	98.6681	6.42285	0.00462386
					plantline	3304.64	1	3304.64	215.117	1.06954e-10
					treatment * plantline	288.101	3	96.0336	6.25136	0.00517443
					Error	245.793	16	15.362
					Total	7563.56	24
					Corrected Total	4134.54	23

## Sheet: rd22
Tests of Between-Subjects Effects
Dependent Variable:rd22
Source	Type III Sum of Squares	df	Mean Square	F	Sig.
Corrected Model	14.3657	7	2.05224	11.2002	4.0234e-05
Intercept	61.3659	1	61.3659	334.907	3.74549e-12
treatment	9.2885	3	3.09617	16.8975	3.24911e-05
plantline	1.2552	1	1.2552	6.85029	0.0186723
treatment * plantline	3.82198	3	1.27399	6.95288	0.00329663
Error	2.93172	16	0.183233
Total	78.6633	24
Corrected Total	17.2974	23

## Sheet: rd29
					Tests of Between-Subjects Effects
					Dependent Variable:rd29
					Source	Type III Sum of Squares	df	Mean Square	F	Sig.
					Corrected Model	12.16	7	1.73714	15.1073	5.79317e-06
					Intercept	38.4544	1	38.4544	334.425	3.78706e-12
					treatment	3.9549	3	1.3183	11.4648	0.000291973
					plantline	5.43052	1	5.43052	47.2274	3.75243e-06
					treatment * plantline	2.77454	3	0.924847	8.04308	0.00171239
					Error	1.83979	16	0.114987
					Total	52.4541	24
					Corrected Total	13.9998	23
